# Supplementary material for: Ocean carbonate system variability in the North Atlantic Subpolar surface water (1993–2017)
Source: Copernicus journal article supplement (doi:10.5194/bg-17-2553-2020), 2020-05-14
Supplement: Supplementary file 1 [file bg-17-2553-2020-supplement.pdf]

Supplement of Biogeosciences, 17, 2553–2577, 2020  
<https://doi.org/10.5194/bg-17-2553-2020-supplement>  
© Author(s) 2020. This work is distributed under  
the Creative Commons Attribution 4.0 License.

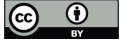

*Supplement of*

## **Ocean carbonate system variability in the North Atlantic Subpolar surface water (1993–2017)**

**Coraline Leseurre et al.**

*Correspondence to:* Coraline Leseurre ([coraline.leseurre@locean-ipsl.upmc.fr](mailto:coraline.leseurre@locean-ipsl.upmc.fr))

The copyright of individual parts of the supplement might differ from the CC BY 4.0 License.

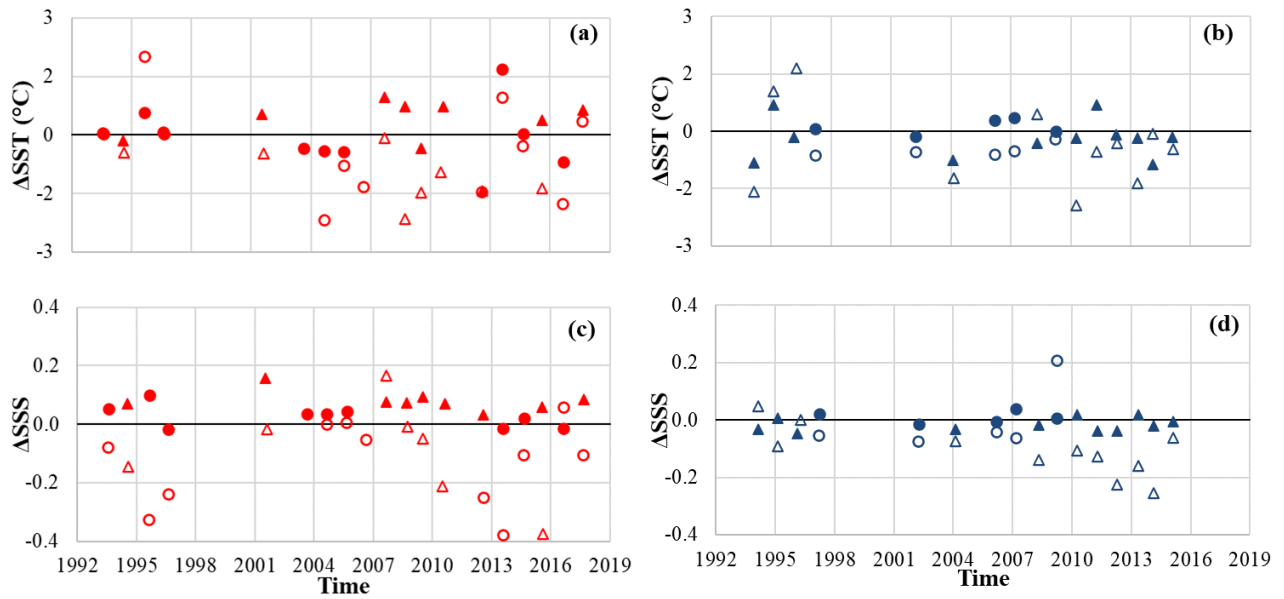

**Figure S1.** Difference of SST (a,b) and SSS (c,d) between Suratlant discrete data and data based on the Binned products constructed by Reverdin et al. (2018a) and updated data available at <https://doi.org/10.6096/SSS-BIN-NASG>, last access 25/03/2020. Data obtained between 1993 and 2017 during summer (in red, a-c) and 1994 and 2015 during winter (in blue, b-d) in box B (open symbols) and by combining all data in boxes C, D, E (filled symbols). Data from February and July are indicated with circles and the reconstructed data are depicted with triangles.

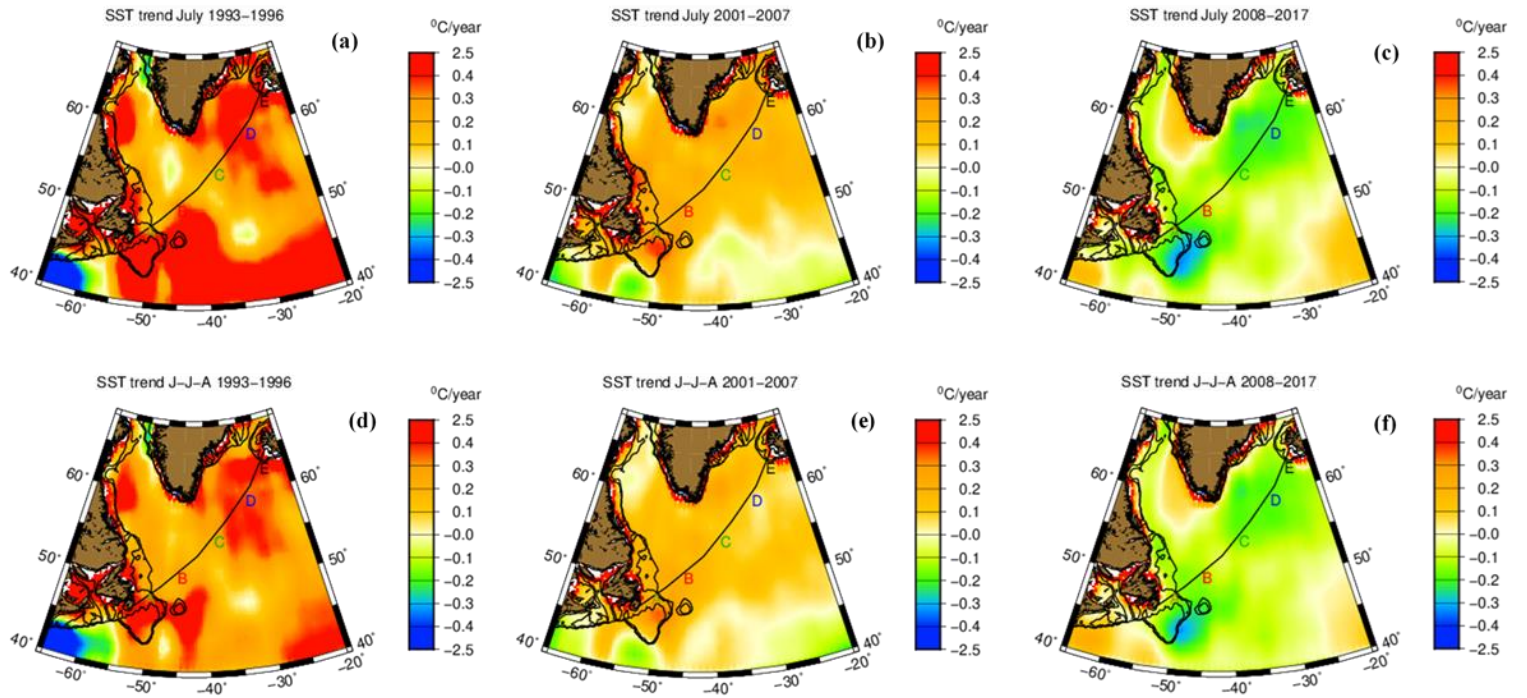

**Figure S2-1.** Regional SST trends maps from NOAA OI.v2 SST products available in ASCII at <http://rda.ucar.edu/datasets/ds277.0/>, last access 6/03/2020; for the three periods during summer, corresponding to July for a), b), c) and mean of June, July, August for d), e), f).

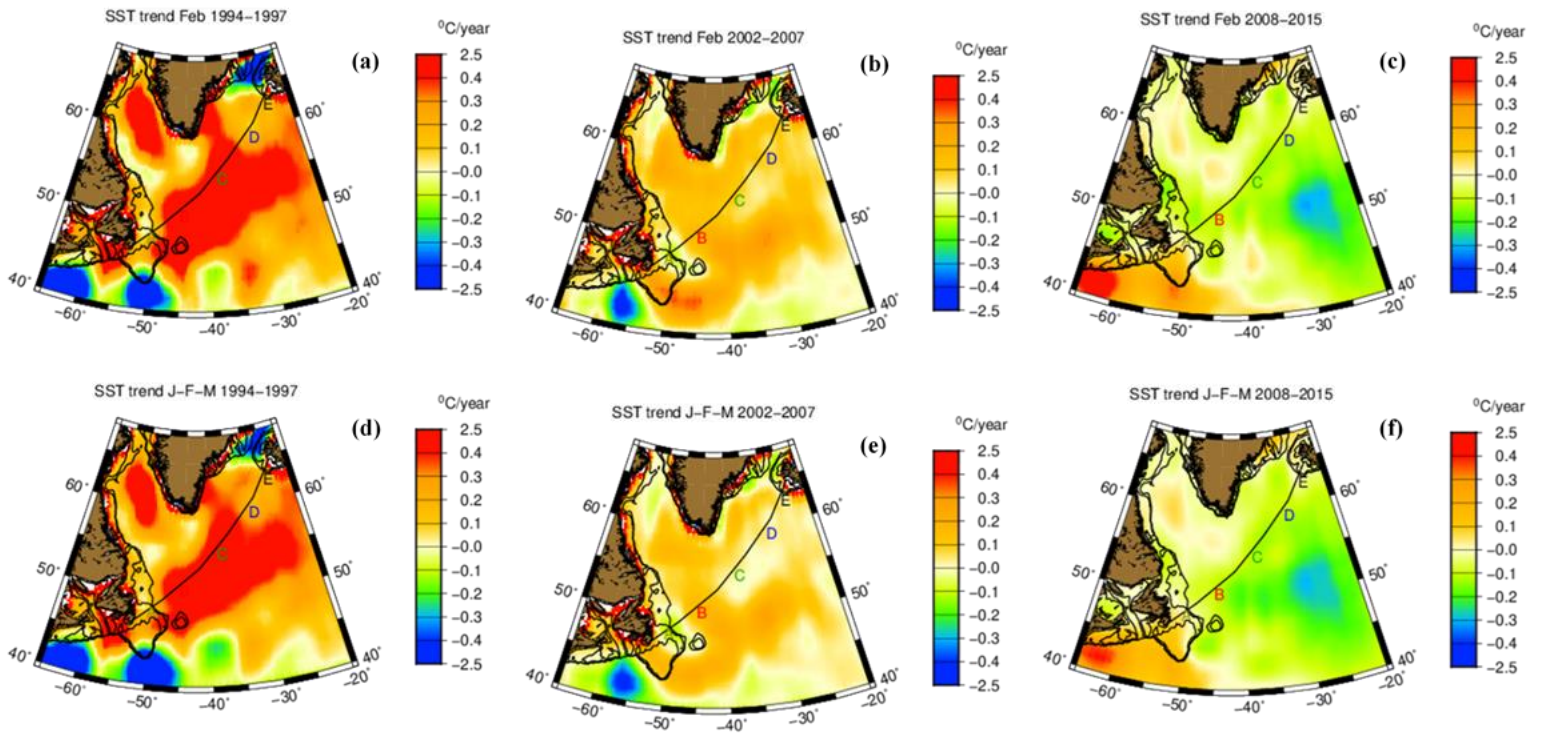

**Figure S2-2.** Regional SST trends maps from NOAA OI.v2 SST products available in ASCII at <http://rda.ucar.edu/datasets/ds277.0/>, last access 6/03/2020; for the three periods during winter, corresponding to February for a), b), c) and mean of January, February, March for d), e), f).

**Table S1.** SST and SSS trends based on Suratlant data (Table 2) and on the Binned products constructed by Reverdin et al. (2018a) available at <https://doi.org/10.6096/SSS-BIN-NASG>, last access 25/03/2020. In bold are represented the significant trends (Student test).

| period    | season | box     | SST °C (yr <sup>-1</sup> ) |                    | SSS (yr <sup>-1</sup> ) |                       |
|-----------|--------|---------|----------------------------|--------------------|-------------------------|-----------------------|
|           |        |         | Suratlant                  | Binned             | Suratlant               | Binned                |
| 1993-2017 | summer | B       | <b>0.05 ± 0.00</b>         | 0.01 ± 0.02        | <b>-0.003 ± 0.000</b>   | -0.003 ± 0.005        |
|           |        | C.D.E   | <b>0.03 ± 0.00</b>         | 0.04 ± 0.02        | <b>0.003 ± 0.000</b>    | 0.001 ± 0.003         |
|           | winter | B       | <b>0.02 ± 0.00</b>         | -0.02 ± 0.02       | <b>0.003 ± 0.000</b>    | -0.003 ± 0.005        |
|           |        | C.D.E   | <b>0.01 ± 0.00</b>         | 0.01 ± 0.02        | <b>0.005 ± 0.000</b>    | <b>0.005 ± 0.002</b>  |
| 1993-1997 | summer | B       | <b>-0.09 ± 0.02</b>        | 0.16 ± 0.36        | <b>0.042 ± 0.001</b>    | -0.025 ± 0.083        |
|           |        | C.D.E   | <b>0.60 ± 0.01</b>         | <b>0.77 ± 0.19</b> | <b>0.004 ± 0.001</b>    | -0.012 ± 0.012        |
|           | winter | B       | <b>-0.19 ± 0.02</b>        | 0.15 ± 0.29        | <b>0.045 ± 0.001</b>    | 0.024 ± 0.063         |
|           |        | C.D.E   | 0.00 ± 0.01                | 0.24 ± 0.09        | <b>-0.018 ± 0.001</b>   | 0.001 ± 0.040         |
| 2001-2007 | summer | B       | <b>0.04 ± 0.01</b>         | 0.04 ± 0.07        | <b>-0.027 ± 0.000</b>   | -0.017 ± 0.013        |
|           |        | C. D. E | -0.01 ± 0.00               | 0.07 ± 0.08        | <b>0.013 ± 0.000</b>    | 0.005 ± 0.013         |
|           | winter | B       | 0.04 ± 0.01                | 0.10 ± 0.05        | <b>-0.019 ± 0.001</b>   | -0.013 ± 0.022        |
|           |        | C. D. E | <b>-0.05 ± 0.01</b>        | 0.10 ± 0.07        | -0.002 ± 0.000          | 0.013 ± 0.008         |
| 2008-2017 | summer | B       | <b>-0.09 ± 0.00</b>        | 0.01 ± 0.06        | <b>-0.013 ± 0.000</b>   | -0.001 ± 0.018        |
|           |        | C. D. E | <b>-0.11 ± 0.00</b>        | -0.11 ± 0.06       | <b>-0.013 ± 0.000</b>   | <b>-0.018 ± 0.008</b> |
|           | winter | B       | 0.02 ± 0.01                | -0.03 ± 0.07       | <b>-0.004 ± 0.000</b>   | -0.028 ± 0.018        |
|           |        | C. D. E | <b>-0.05 ± 0.00</b>        | -0.11 ± 0.05       | <b>-0.006 ± 0.000</b>   | -0.007 ± 0.005        |
